# Supplementary material for: Low Bone Mineral Density in Hemophiliacs
Source: Frontiers journal article supplement (doi:10.3389/fmed.2022.794456), 2022-02-02
Supplement: Data_Sheet_1.PDF [file Data_Sheet_1.PDF]

**Supplementary Figure 1: PRISMA flow diagram for systematic reviews which includes search of database and other sources.**

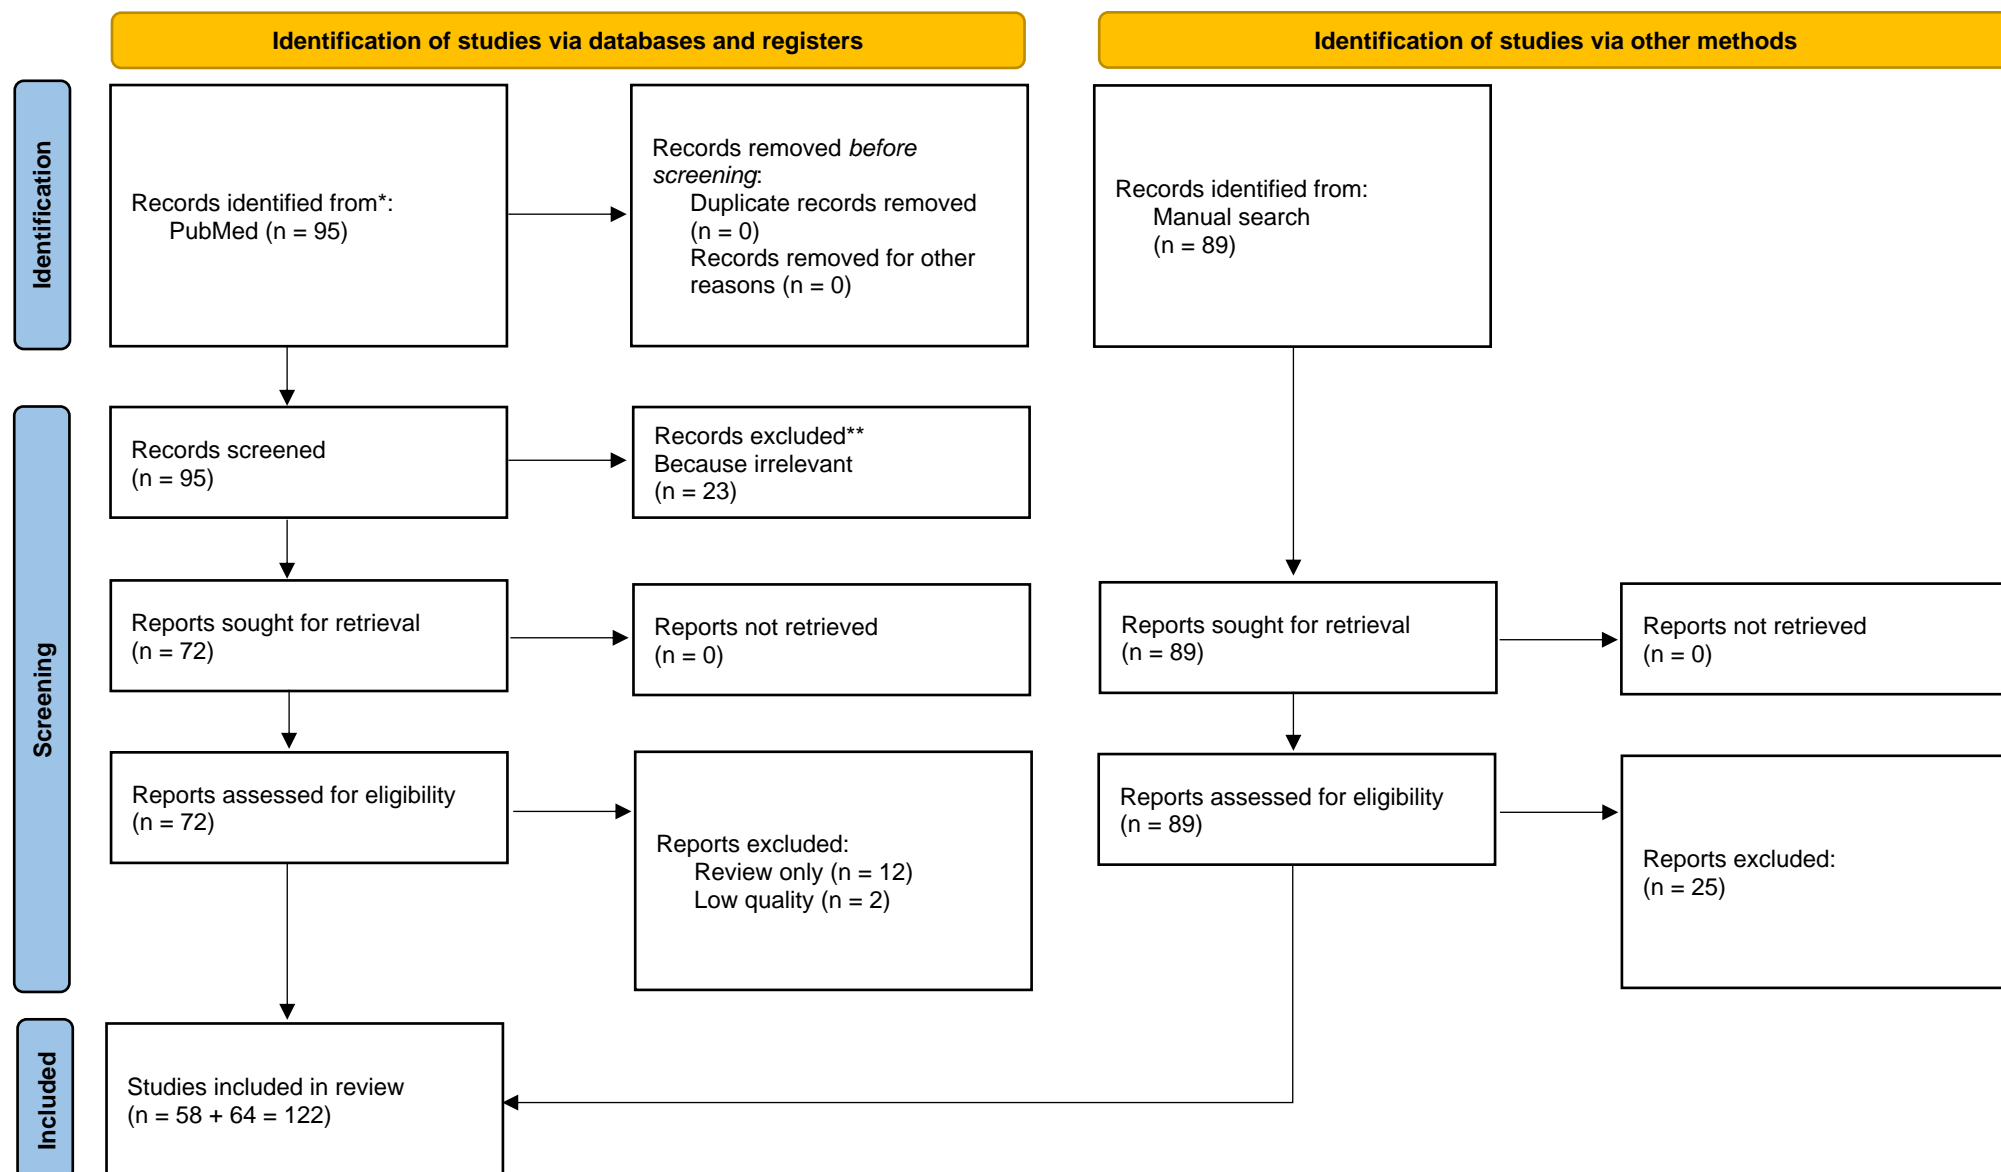

\*Consider, if feasible to do so, reporting the number of records identified from each database or register searched (rather than the total number across all databases/registers).

\*\*No automation tool was used.

From: Page MJ, McKenzie JE, Bossuyt PM, Boutron I, Hoffmann TC, Mulrow CD, et al. The PRISMA 2020 statement: an updated guideline for reporting systematic reviews. BMJ 2021;372:n71. doi: 10.1136/bmj.n71.
